# Supplementary material for: A viologen phosphorus dendritic molecule as a carrier of ATP and Mant-ATP: spectrofluorimetric and NMR studies
Source: Royal Society of Chemistry journal article supplement (doi:10.1039/c4nj01176g), 2014-01-01
Supplement: c4nj01176g1.pdf [file c4nj01176g1.pdf]

ARTICLE

# Viologen phosphorus dendritic molecule as carrier of ATP and Mant-ATP. Spectrofluorimetric and NMR studies.

Cite this: DOI: 10.1039/x0xx00000x

Received 00th January 2012,  
Accepted 00th January 2012

DOI: 10.1039/x0xx00000x

www.rsc.org/

Aleksandra Szulc<sup>a\*</sup>, Maria Zablocka<sup>b\*</sup>, Yannick Coppel<sup>c</sup>, Christian Bijani<sup>c</sup>,  
Wojciech Dabkowski<sup>b</sup>, Maria Bryszewska<sup>a</sup>, Barbara Klajnert-Maculewicz<sup>a</sup>, Jean-  
Pierre Majoral<sup>c‡</sup>

<sup>a</sup> Department of General Biophysics, University of Lodz,  
141/143 Pomorska St., 90-236 Lodz, Poland..

<sup>b</sup> Centre of Molecular and Macromolecular Studies, Polish  
Academy of Sciences, Sienkiewicza 112, 90-363 Lodz, Poland.

<sup>c</sup> Laboratoire de Chimie de Coordination du CNRS (LCC), 205  
route de Narbonne, F-31077 Toulouse cedex 4, France.

majoral@lcc-toulouse.fr

\* Authors contributed equally

‡ Corresponding author

Electronic Supplementary Information (ESI) available:

DOI: 10.1039/b000000x/

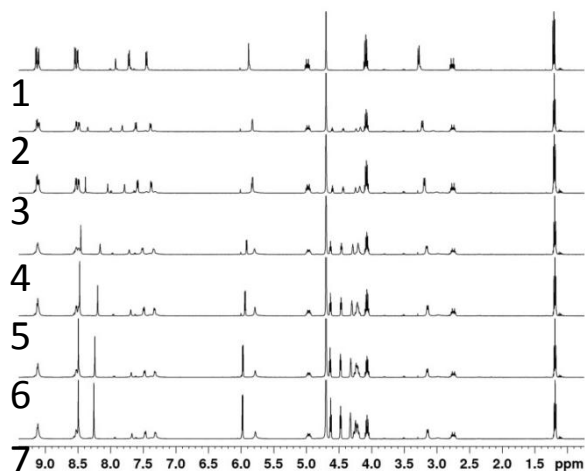

**Figure S1.** Full <sup>1</sup>H NMR titration spectra of the dendrimer when mixed with ATP. The concentration of the dendrimer was kept constant at 1.2 mmol/L. The molar ratio of ATP – dendrimer ranges from 0 to 10 (1-7).

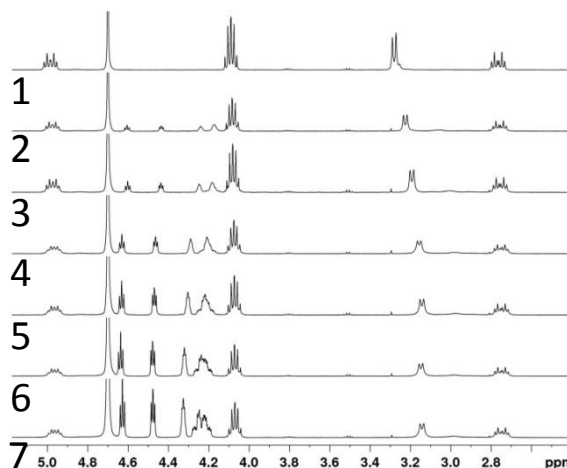

**Figure S2.** Expanded aliphatic region of the <sup>1</sup>H NMR titration spectra of the dendrimer when mixed with ATP. The concentration of the dendrimer was kept constant at 1.2 mmol/L. The molar ratio of ATP – dendrimer ranges from 0 to 10 (1-7)

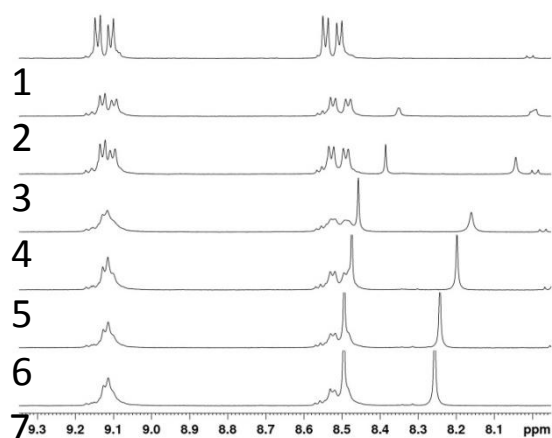

**Figure S3.**  $^1\text{H}$  NMR titration spectra of the viologen dendrimer part when mixed with ATP. The concentration of the dendrimer was kept constant at 1.2 mmol/L. The molar ratio of ATP – dendrimer ranges from 0 to 10 (1-7).

**Table S1.** Comparison of the maximum chemical shift difference (ppm),  $\delta_{\text{initial}} - \delta_{\text{final}}$  of the dendrimer  $^1\text{H}$  resonances on titration with ATP.

| Hydrogen position         | H1   | H2   | H3   | H4   | H5   | H6   | H7   | H8   | H9   | H10  | H11  |
|---------------------------|------|------|------|------|------|------|------|------|------|------|------|
| Chemical shift difference | 0.14 | 0.25 | 0.25 | 0.14 | 0.09 | 0.01 | 0.02 | 0.03 | 0.01 | 0.02 | 0.02 |

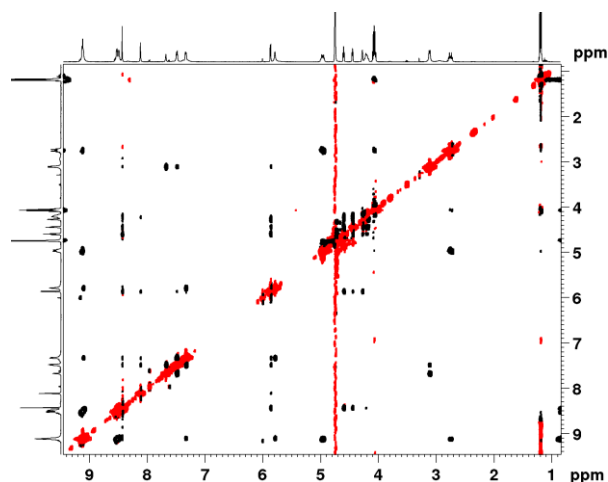

**Figure S4.** Full  $^1\text{H}$ - $^1\text{H}$  ROESY spectrum of the 1/4 dendrimer – ATP mixture.

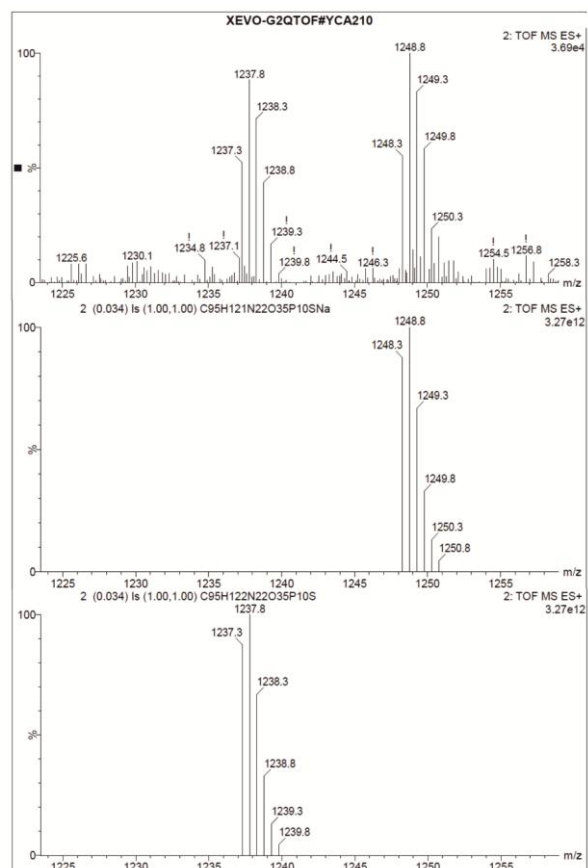

**Figure S5.** Mass Spectrometry of the ATP – dendrimer complex showing the formation of a 2/1 complex. Spectra were recorded on a Xevo-G2QTOF (Waters) on ESI(+), Flow Injection Analysis (0.15 mL/min) in 100% MeOH (from 100 to 3000 m/z).
